# Supplementary material for: A Muscle Physiology-Based Framework for Quantifying Training Load in Resistance Exercises
Source: Preprints.org preprint supplement (doi:10.20944/preprints202410.1510.v1), 2024-10-18
Supplement: Supplementary file 1 [file supplementary]

**Title: A Muscle Physiology-Based Framework for Quantifying Training Load in Resistance Exercises**

**Running title: Physiology-based framework for training load**

, , , and

1 Seenovate, Montpellier, 34000, France

2 EuroMov Digital Health in Motion, Univ Montpellier, IMT Mines Alès, Montpellier, France

3 DMeM, Univ Montpellier, INRAE, Montpellier, France

*Corresponding author: Stephane Perrey – stephane.perrey@umontpellier.fr

# Appendix 1

## Tables

Table 1. Configuration of the three-knee extension testing sessions

| Session | Sets | Repetitions | Intensity (% MVC) | Passive recovery (s) |
| --- | --- | --- | --- | --- |
| 1 | 1 | 24 | 58 % | N/A |
| 2 | 2 | 9 | 77 % | 180 |
| 3 | 5 | 3 | 93 % | 240 |

Table 2. Parameters inference regarding then normalised averaged torque produced at exercise.

| Effect | Parameter |  | Std.error | t | p.value |  |  |
| --- | --- | --- | --- | --- | --- | --- | --- |
| Fixed | Intercept | 27.762 | 2.590 | 10.719 | < 0.001 | 22.547 | 32.978 |
| Fixed | C2 | 10.862 | 0.883 | 12.297 | < 0.001 | 9.134 | 12.590 |
| Fixed | C3 | 17.865 | 0.933 | 19.144 | < 0.001 | 16.039 | 19.690 |
| Fixed  Fixed  Fixed  Random  Random | Intercept (sd)  Observation (sd) | -0.301  0.361  0.515  9.779  5.219 | 0.040  0.073  0.090 | -7.442  4.913  5.723 | < 0.001  < 0.001  < 0.001 | -0.377  0.217  0.339  6.843  4.962 | -0.220  0.504  0.691  14.199  5.465 |

Table 3. Parameters inference regarding the distributions of summated EMG signals at exercise. denotes standardised regression coefficients.

| Effect | Parameter |  | Std.error | t | p.value |  |  |
| --- | --- | --- | --- | --- | --- | --- | --- |
| Fixed | Intercept | 376.969 | 13.272 | 28.402 | < 0.001 | 351.232 | 404.090 |
| Fixed | N | 8.730 | 2.068 | 4.221 | < 0.001 | 4.690 | 12.778 |
| Fixed | C2 | 4.528 | 13.171 | 0.344 | 0.732 | -22.175 | 31.302 |
| Fixed | C3 | -50.893 | 59.541 | -0.855 | 0.395 | -172.570 | 70.940 |
| Fixed | Velocity | 43.982 | 7.960 | 5.525 | < 0.001 | 27.879 | 60.129 |
| Fixed | C2:velocity | -51.639 | 11.390 | -4.534 | < 0.001 | -74.226 | -28.284 |
| Fixed | C3:velocity | -48.122 | 47.279 | -1.018 | 0.311 | -143.725 | 48.820 |
| Random | Intercept (sd) | 38.178 |  |  |  | 24.999 | 56.029 |
| Random | Observation (sd) | 52.809 |  |  |  | 49.996 | 55.462 |

Table 4. Parameters inference regarding changes in blood lactate concentrations () in response to exercise.

| Effect | Parameter |  | Std.error | t | p.value |  |  |
| --- | --- | --- | --- | --- | --- | --- | --- |
| Fixed | Intercept | 3.273 | 0.519 | 6.306 | < 0.001 | 2.287 | 4.240 |
| Fixed | C2 | -1.932 | 0.599 | -3.224 | 0.003 | -3.053 | -0.803 |
| Fixed | C3 | -9.412 | 2.364 | -3.982 | < 0.001 | -13.820 | -4.853 |
| Fixed | Velocity | -0.652 | 0.370 | -1.762 | 0.086 | -1.343 | 0.051 |
| Fixed | C2:velocity | -1.641 | 0.729 | -2.252 | 0.031 | -3.006 | -0.282 |
| Fixed | C3:velocity | -7.814 | 2.400 | -3.256 | 0.002 | -12.303 | -3.285 |
| Random | Intercept (sd) | 0.762 |  |  |  | 0.257 | 1.251 |
| Random | Observation (sd) | 1.025 |  |  |  | 0.752 | 1.255 |

## Figures


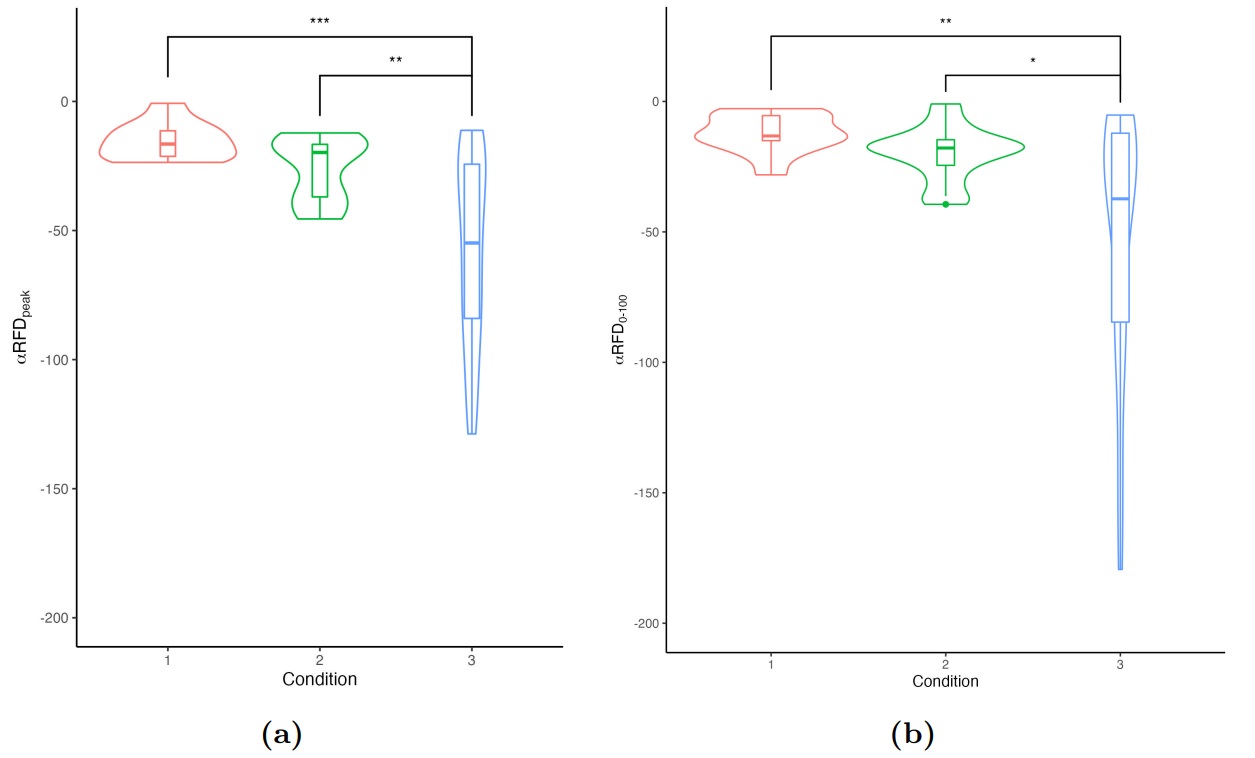


Figure 1. Distribution of regression slopes for changes in (a) and (b) across repetitions of knee extensions.


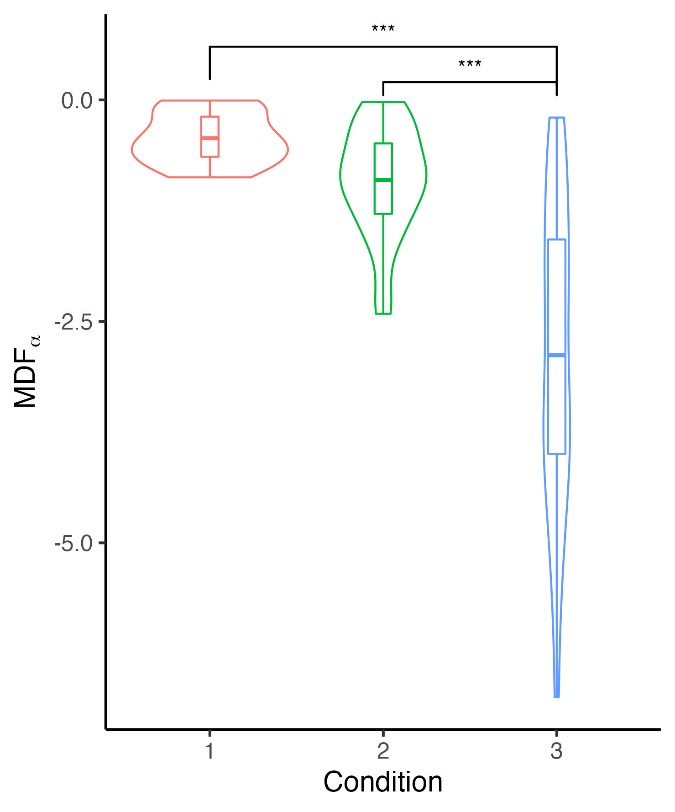


Figure 2. Distribution of regression slopes for changes in median frequencies from power spectrum () across repetitions of isokinetic knee extensions.


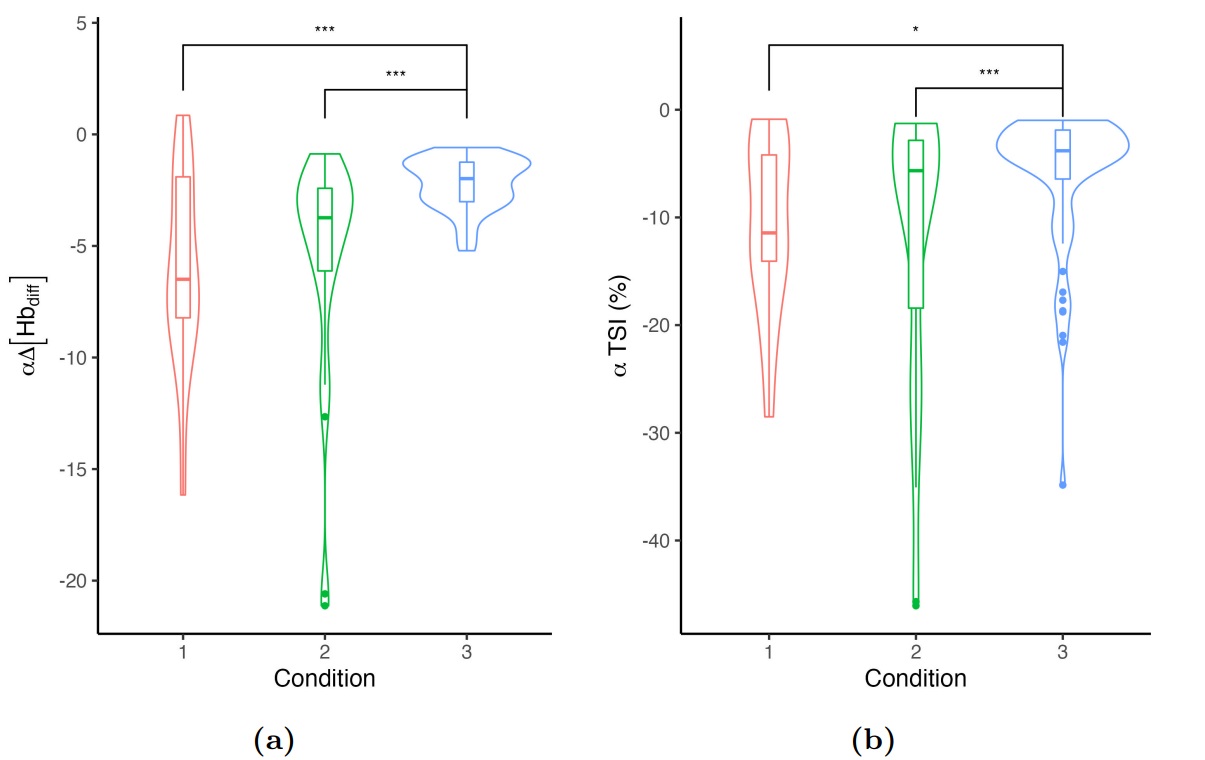


Figure 3. Distribution of (a) rate decay of and (b) rate decay of TSI at exercise.
